# Supplementary material for: Concatenated alignments and the case of the disappearing tree
Source: PubMed Central journal article supplement (PMC4302582; doi:10.1186/s12862-014-0266-0), 2014-12-30
Supplement: 12862_2014_266_MOESM9_ESM.pdf [file 12862_2014_266_MOESM9_ESM.pdf]

# Gammaproteobacteria

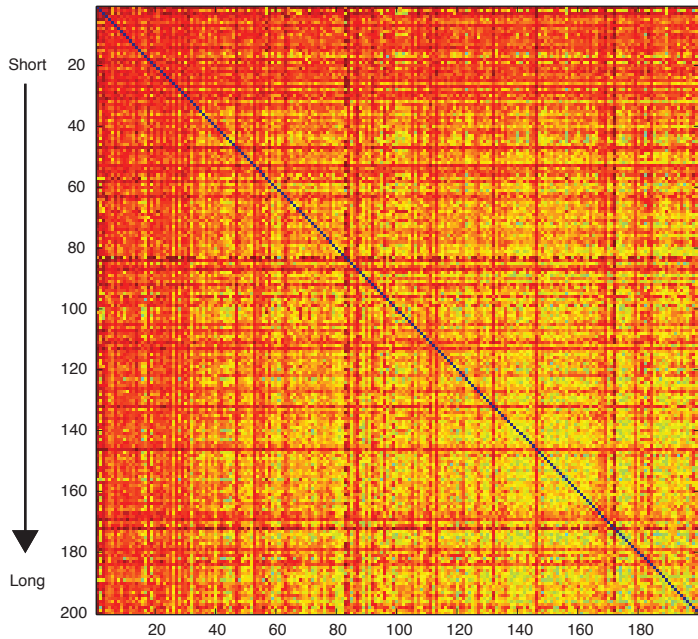

# Fungi

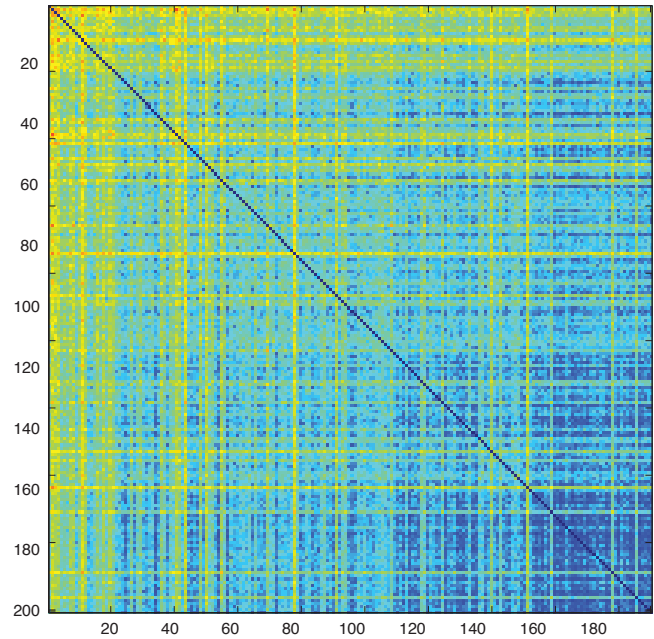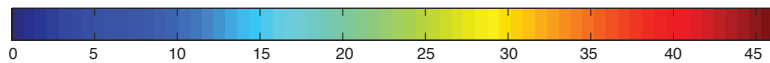

Number of different splits between trees
